# Supplementary material
Source: PubMed Central journal article supplement (PMC4677914)
Supplement: supp_pp.15.01361_PP2015-01361R1_Supplemental_Materialfig1.pdf [file supp_pp.15.01361_PP2015-01361R1_Supplemental_Materialfig1.pdf]

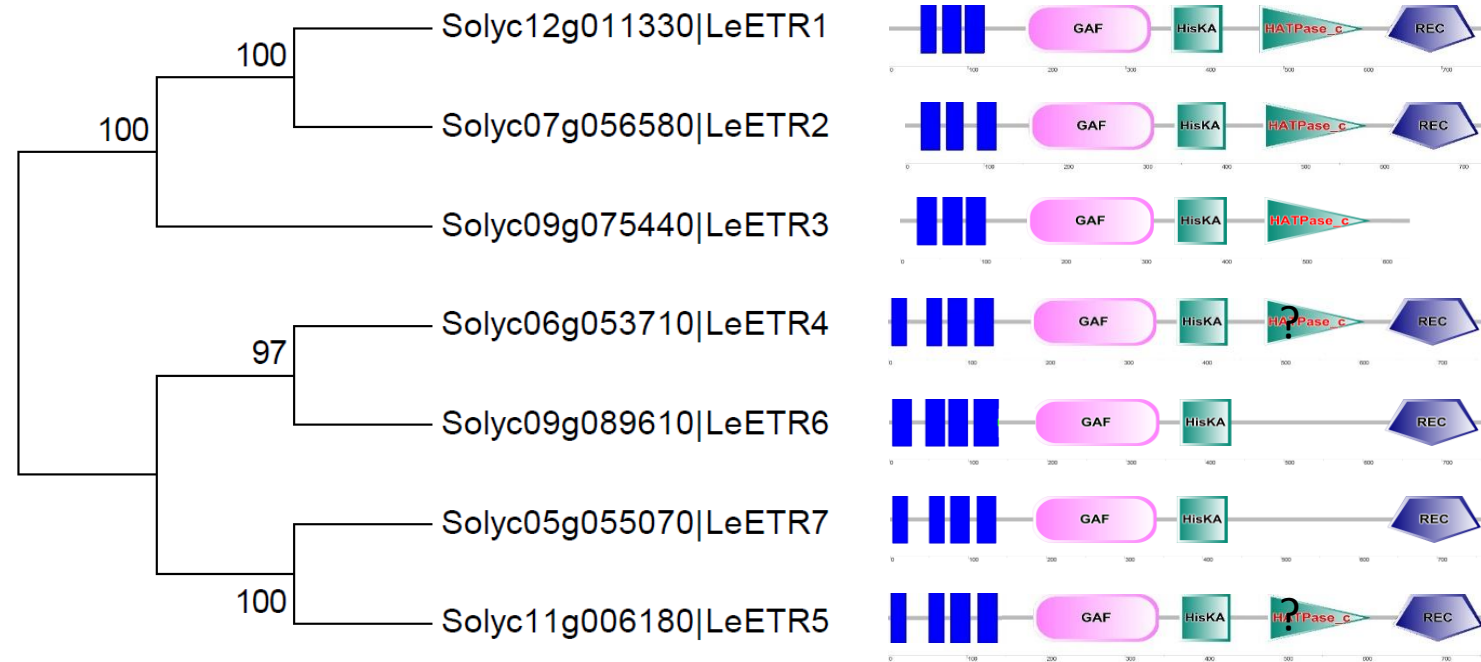

**Figure S1.** Phylogenetic tree of Tomato ETR. Phylogenetic trees were constructed with the whole protein sequences using neighbour joining method. Structural domains predicted by the SMART online tool (<http://smart.embl-heidelberg.de/>) were represented on for each ETR.
