# Supplementary material
Source: PubMed Central journal article supplement (PMC4677914)
Supplement: supp_pp.15.01361_PP2015-01361R1_Supplemental_Materialfig2.pdf [file supp_pp.15.01361_PP2015-01361R1_Supplemental_Materialfig2.pdf]

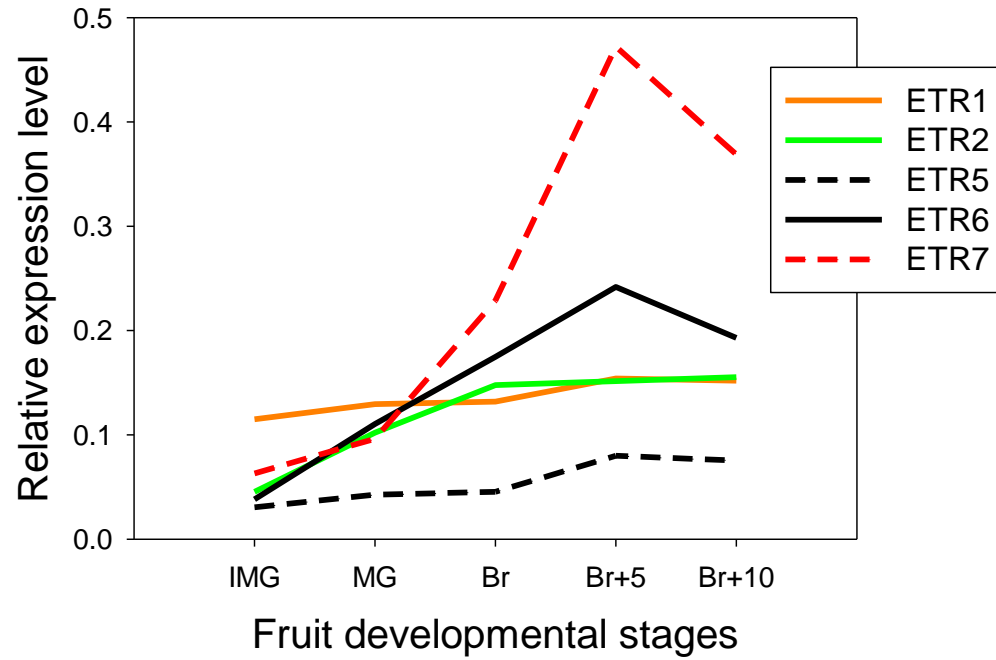

**Figure S2.** Expression data of ETR1, ETR2, ETR5, ETR6, ETR7 during fruit ripening extracted using TomExpress platform. Five fruit developmental stages have been studied: Immature Green (IMG), Mature Green (MG), Breaker (B), 5 days after Breaker (B+5), 10 days after Breaker (B+10). For each gene, the plot represents normalized counts per base for RNA-Seq data released from transcriptome analyses in multiple tomato cultivars.
