# Supplementary material
Source: PubMed Central journal article supplement (PMC4677914)
Supplement: supp_pp.15.01361_PP2015-01361R1_Supplemental_Materialtbl.pdf [file supp_pp.15.01361_PP2015-01361R1_Supplemental_Materialtbl.pdf]

1 **Supplemental Table S1.** Correspondence between common names and their Solyc numbers.  
 2 Others names proposed by some literature are also listed. ACC, 1-aminocyclopropane-1-  
 3 carboxylic acid; ETR, Ethylene receptors; CTR, constitutive triple-response; EIN2, Ethylene  
 4 insensitive2; EIL, Ethylene insensitive3-Like; EBF, EIN3-binding F-box; ERF, Ethylene  
 5 response factor.

| <i>Unified nomenclature</i>      | <i>Solyc number</i> | <i>Other names</i>                      |
|----------------------------------|---------------------|-----------------------------------------|
| <b><i>ACC synthase (ACS)</i></b> |                     |                                         |
| <i>ACS1A</i>                     | Solyc08g081550      |                                         |
| <i>ACS1B</i>                     | Solyc08g081540      |                                         |
| <i>ACS2</i>                      | Solyc01g095080      |                                         |
| <i>ACS3</i>                      | Solyc02g091990      |                                         |
| <i>ACS4</i>                      | Solyc05g050010      |                                         |
| <i>ACS5</i>                      | Solyc04g077410      |                                         |
| <i>ACS6</i>                      | Solyc08g008100      |                                         |
| <i>ACS7</i>                      | Solyc02g063540      |                                         |
| <i>ACS8</i>                      | Solyc03g043890      |                                         |
| <i>ACS9</i>                      | Solyc07g026900      |                                         |
| <i>ACS10</i>                     | Solyc12g008740      |                                         |
| <i>ACS11</i>                     | Solyc03g007070      |                                         |
| <i>ACS12</i>                     | Solyc08g079750      |                                         |
| <i>ACS13</i>                     | Solyc12g056180      |                                         |
| <b><i>ACC oxidase (ACO)</i></b>  |                     |                                         |
| <i>ACO1</i>                      | Solyc07g049530      |                                         |
| <i>ACO2</i>                      | Solyc12g005940      |                                         |
| <i>ACO3</i>                      | Solyc07g049550      | <i>ACO4</i> (Van der Poel et al., 2014) |
| <i>ACO4</i>                      | Solyc02g081190      |                                         |
| <i>ACO5</i>                      | Solyc07g026650      |                                         |
| <i>ACO6</i>                      | Solyc02g036350      |                                         |
| <b><i>ETR and partners</i></b>   |                     |                                         |
| <i>RAN1</i>                      | Solyc02g068490      |                                         |
| <i>GR</i>                        | Solyc01g104340      |                                         |
| <i>GRL1</i>                      | Solyc08g065320      |                                         |
| <i>GRL2</i>                      | Solyc02g062420      |                                         |
| <i>TPR1</i>                      | Solyc07g006180      |                                         |
| <i>ETR1</i>                      | Solyc12g011330      |                                         |
| <i>ETR2</i>                      | Solyc07g056580      |                                         |
| <i>ETR3</i>                      | Solyc09g075440      |                                         |
| <i>ETR4</i>                      | Solyc06g053710      |                                         |
| <i>ETR5</i>                      | Solyc11g006180      |                                         |
| <i>ETR6</i>                      | Solyc09g089610      |                                         |

|                          |                |                                               |
|--------------------------|----------------|-----------------------------------------------|
| <i>ETR7</i>              | Solyc05g055070 |                                               |
| <b>CTR</b>               |                |                                               |
| <i>CTR1</i>              | Solyc10g083610 |                                               |
| <i>CTR2</i>              | Solyc01g097980 |                                               |
| <i>CTR3</i>              | Solyc09g009090 |                                               |
| <i>CTR4</i>              | Solyc10g085570 |                                               |
| <b>EIN2 and EIN-like</b> |                |                                               |
| <i>EIN2</i>              | Solyc09g007870 |                                               |
| <i>EIL1</i>              | Solyc06g073720 |                                               |
| <i>EIL2</i>              | Solyc01g009170 |                                               |
| <i>EIL3</i>              | Solyc01g096810 |                                               |
| <i>EIL4</i>              | Solyc06g073730 |                                               |
| <i>EIL5</i>              | Solyc01g014480 |                                               |
| <i>EIL6</i>              | Solyc01g006650 |                                               |
| <b>EBF</b>               |                |                                               |
| <i>EBF1</i>              | Solyc08g060810 |                                               |
| <i>EBF2</i>              | Solyc12g009560 |                                               |
| <i>EBF3</i>              | Solyc07g008250 |                                               |
| <i>EBF4</i>              | Solyc06g049010 |                                               |
| <b>ERF</b>               |                |                                               |
| <i>ERF.A3</i>            | Solyc05g052050 | <i>Pti4</i> (Zhou et al., 1997)               |
| <i>ERF.B1</i>            | Solyc05g052040 |                                               |
| <i>ERF.B2</i>            | Solyc03g093560 | <i>ERF5</i> (Pan et al., 2012)                |
| <i>ERF.B3</i>            | Solyc05g052030 | <i>LeERF4</i> (Tournier et al. 2003)          |
| <i>ERF.B13</i>           | Solyc08g078190 |                                               |
| <i>ERF.C1</i>            | Solyc05g051200 | <i>TERF1/JERF2</i> (Huang et al., 2004)       |
| <i>ERF.D2</i>            | Solyc12g056590 |                                               |
| <i>ERF.E1</i>            | Solyc09g075420 | <i>LeERF2</i> (Pirrello et al., 2006)         |
| <i>ERF.E2</i>            | Solyc06g063070 | <i>JERF1</i> (Zhang et al., 2004)             |
| <i>ERF.E4</i>            | Solyc01g065980 | <i>SIERF6</i> (Lee et al., 2012)              |
| <i>ERF.E5</i>            | Solyc12g049560 |                                               |
| <i>ERF.F1</i>            | Solyc10g006130 | <i>SIERF36</i> (Upadhyay et al., 2013)        |
| <i>ERF.F2</i>            | Solyc07g064890 |                                               |
| <i>ERF.F3</i>            | Solyc07g049490 |                                               |
| <i>ERF.F4</i>            | Solyc07g053740 |                                               |
| <i>ERF.F5</i>            | Solyc10g009110 | <i>SIERF3/LeERF3b</i> (Tournier et al., 2003) |
| <i>ERF.F6</i>            | Solyc12g005960 |                                               |
| <i>ERF.H10</i>           | Solyc04g054910 |                                               |
| <i>ERF.H12</i>           | Solyc04g072900 |                                               |
